# Supplementary material
Source: publisher figshare collection journal article supplement (https://acs.figshare.com/ndownloader/files/4701937)
Supplement: Supplementary file 1 [file 4701937]

## Supporting Information

### **Ru(II)trisbipyridine Functionalized Gold Nanorods. Morphological Changes and Excited-State Interactions**

**Meghan Jebb<sup>†</sup>, P. K. Sudeep,<sup>†</sup> P. Pramod,<sup>#</sup> K. George Thomas,<sup>#\*</sup> and**

**Prashant V. Kamat<sup>†\*</sup>**

**Radiation Laboratory, Department of Chemistry and Biochemistry and Department and  
Chemical and Biomolecular Engineering**

**University of Notre Dame, Notre Dame, Indiana 46556-0579**

**and**

**Photosciences and Photonics, Regional Research Laboratory (CSIR)  
Trivandrum 695 019, India**

---

<sup>†</sup> University of Notre Dame (Email: [pkamat@nd.edu](mailto:pkamat@nd.edu))

<sup>#</sup> Regional Research Laboratory, Trivandrum (Email: [kgt@vsnl.com](mailto:kgt@vsnl.com))

## Estimation of number of thiol and Ru-C<sub>5</sub>-SH molecules bound to gold nanorods

The absorbance (O.D) at 453 nm for Ru(bpy)<sub>3</sub><sup>2+</sup>-C<sub>5</sub>-SH = 0.0065.

The extinction coefficient for Ru(bpy)<sub>3</sub><sup>2+</sup>-C<sub>5</sub>-SH at 453 nm =  $1.49 \times 10^4 \text{ M}^{-1}\text{cm}^{-1}$ .

The concentration of Ru(bpy)<sub>3</sub><sup>2+</sup>-C<sub>5</sub>-SH bound onto Au nanorods = 0.436  $\mu\text{M}$ .

The absorbance (O.D) at 700 nm for Au nanorods = 0.54

The extinction coefficient for Au nanorods at 700 nm =  $0.5 \times 10^{10} \text{ M}^{-1}\text{cm}^{-1}$ .

The concentration of Au nanorods used = 0.108 nM

The ratio of Ru(bpy)<sub>3</sub><sup>2+</sup>-C<sub>5</sub>-SH to rod =  $0.436 \times 10^{-6} / 0.108 \times 10^{-9} = 4037$   
**= 1:4037**

The total surface area of Au nanorods (length 40 nm and radius 25 nm)  
 $= 3140 \text{ nm}^2 + 1963 \text{ nm}^2$   
**= 5103 nm<sup>2</sup>**

Footprint of thiol =  $0.214 \text{ nm}^2$

Maximum number of thiols that can be accommodated by Au nanorods  
**= 14672 (lateral) + 9172 (both ends)**  
**= 23844**

The ratio of Ru(bpy)<sub>3</sub><sup>2+</sup>-C<sub>5</sub>-SH to dodecane thiol =  $4037 : (23844 - 4037) \approx 1:5$
